# Supplementary material for: Differential expression of coagulation pathway-related proteins in diabetic urine exosomes
Source: Springer Nature journal article supplement (doi:10.1186/s12933-023-01887-4), 2023-06-22
Supplement: MOESM1 [file 25525758]

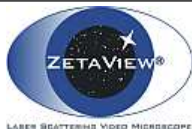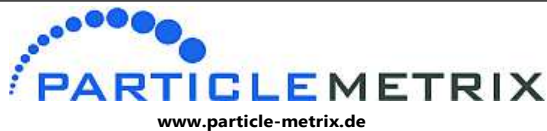

Operator (Report): Administrator  
Video Operator: Administrator

**Sample Parameters**

Sample Name: 196  
Comment: Au20nm 1:5000, Sample Remarks0:  
Sample Remarks1:  
Sample Remarks2:  
Electrolyte: h2o  
Temperature: 27.95 °C sensed  
pH 7.4 entered  
Conductivity: 0.00 µS/cm entered

**Result (sizes in nm)**

|              | Number | Concentration | Volume |
|--------------|--------|---------------|--------|
| Median (X50) | 119.1  | 119.1         | 189.1  |
| Span         | 55.8   | 55.8          | 79.5   |

Concentration: 2.0E+8 Particles / mL  
Dilution Factor: 100  
Original Concentration: 2.0E+10 Particles / mL

**Measurement Parameters**

Cell S/N: NTA

**Quality**

Average Counted Particles per Frame: 444  
Number of Traced Particles: 1031

**Measurement Mode: Size Distribution 4 Cycles**

11 Positions, 2 Removed for Analysis

**Analysis Parameters**

Max Area: 1000, Min Area: 10, Min Brightness: 30

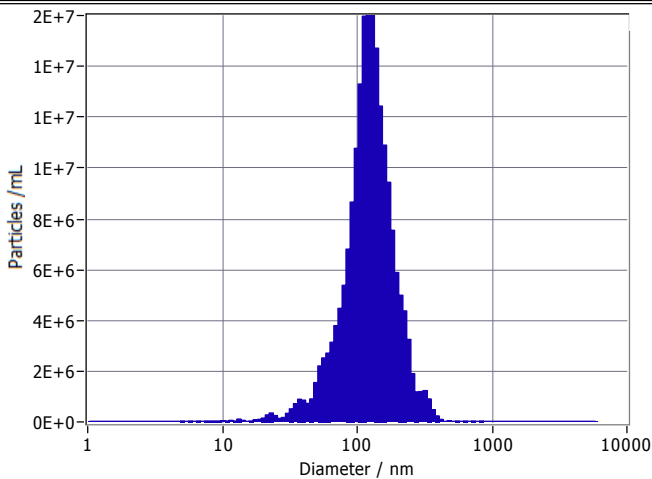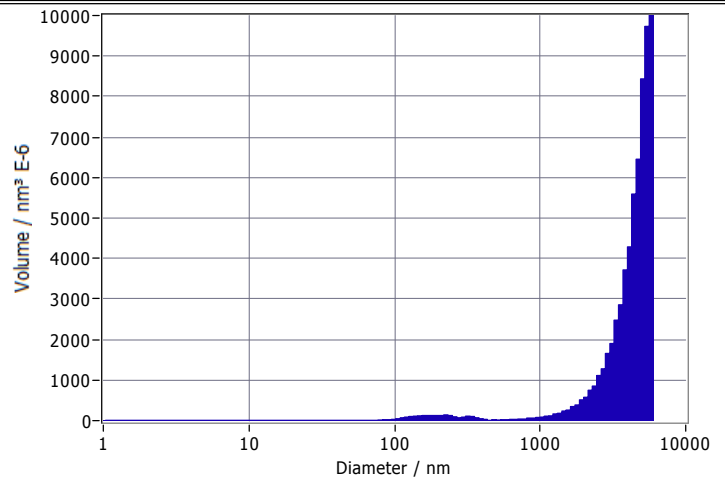

**Peak Analysis (Concentration)**

| Diameter / nm | Particles/mL | FWHM / nm | Percentage |
|---------------|--------------|-----------|------------|
| 123.7         | 1.7E+7       | 82.9      | 98.9       |
| 13.1          | 9.9E+4       | 2.5       | 0.1        |
| 557.1         | 3.9E+4       | 119.0     | 0.1        |
| 9.5           | 3.5E+4       | 4.6       | 0.1        |
| 7.0           | 3.3E+4       | 1.2       | 0.1        |

**X Values**

|        | Number | Concentration | Volume |
|--------|--------|---------------|--------|
| X10    | 67.1   | 67.1          | 115.1  |
| X50    | 119.1  | 119.1         | 189.1  |
| X90    | 194.6  | 194.6         | 318.4  |
| Span   | 1.1    | 1.1           | 1.1    |
| Mean   | 131.6  | 131.6         | 210.4  |
| StdDev | 55.8   | 55.8          | 79.5   |

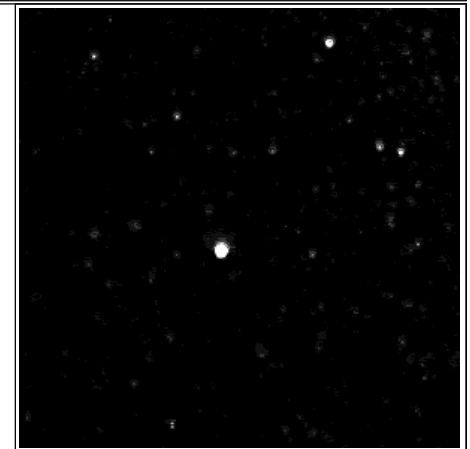

**Comment**

(Signature)
